# Supplementary material for: Calcium Fluxes in Work-Related Muscle Disorder: Implications from a Rat Model
Source: Hindawi journal article supplement (doi:10.1155/2019/5040818), 2019-09-30

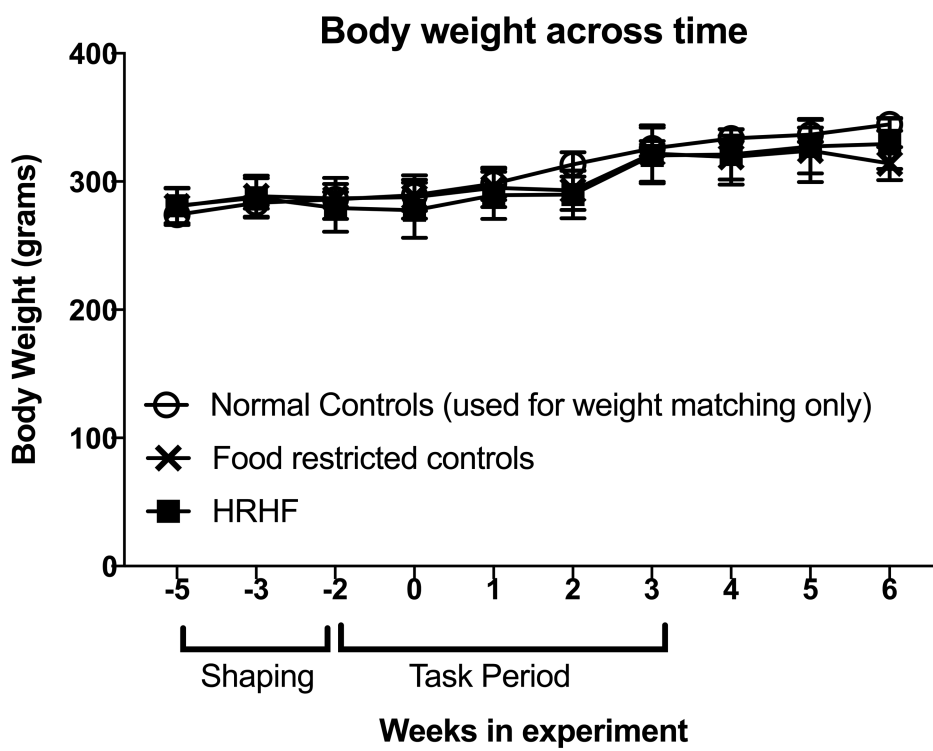

Supplement: f1 [file 5040818.f1.pdf]
